# Supplementary material for: Circulating Tissue Polypeptide-Specific Antigen in Pre-Diagnostic Pancreatic Cancer Samples
Source: MDPI journal article supplement (doi:10.3390/cancers13215321), 2021-10-23

## Supplementary Information

**Figure S1.** Kendall's correlation between age and TPS levels in healthy controls (n = 328).

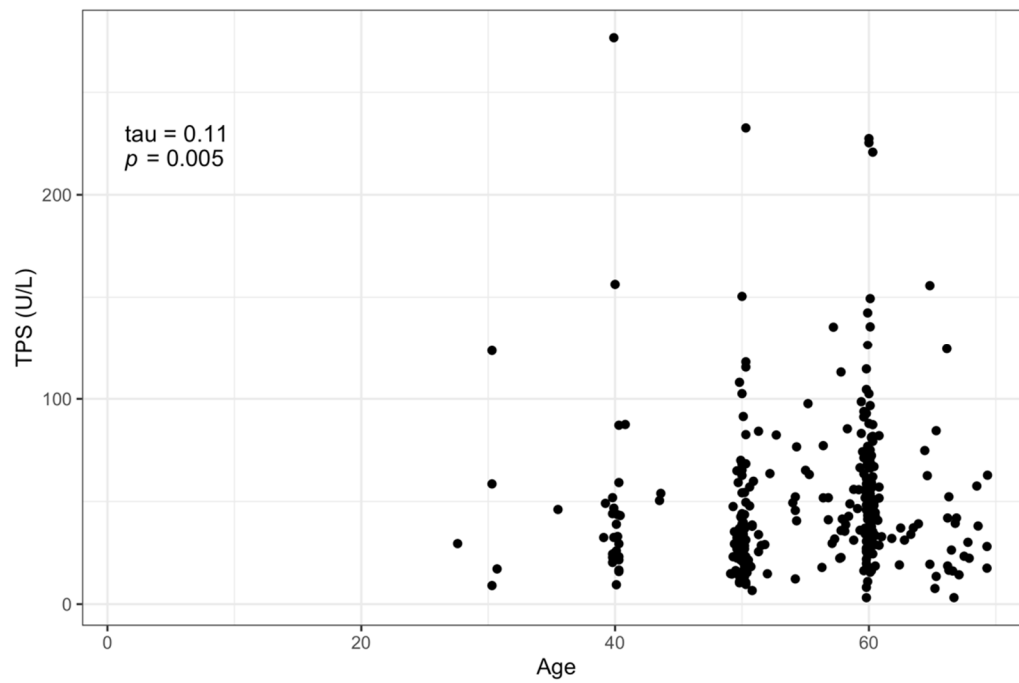

**Figure S2.** Circulating TPS levels stratified into groups according to (A) follow-up time from sample date to PDAC diagnosis, or (B) follow-up time from sample date to time of death, along with TPS levels at diagnosis. The healthy controls (Ctrl) include only the pre-diagnostic controls. y = years, m = months.

**A**

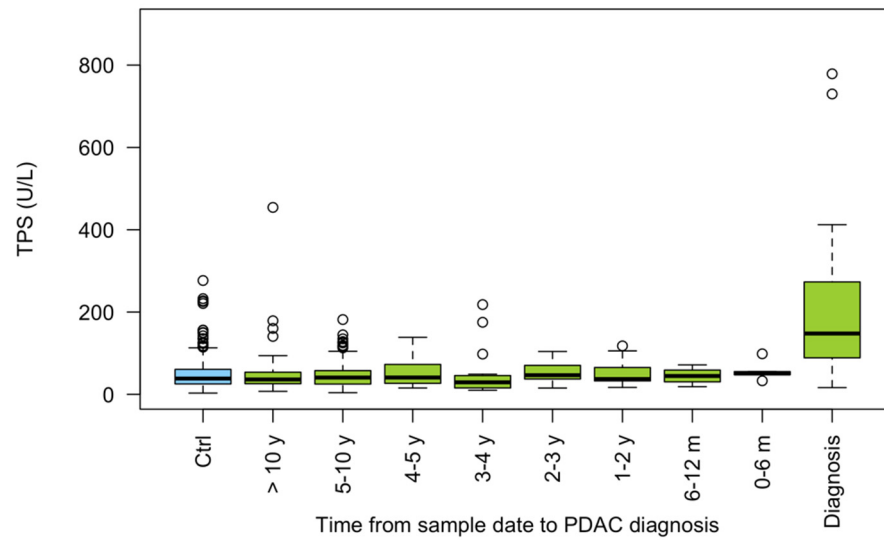

**B**

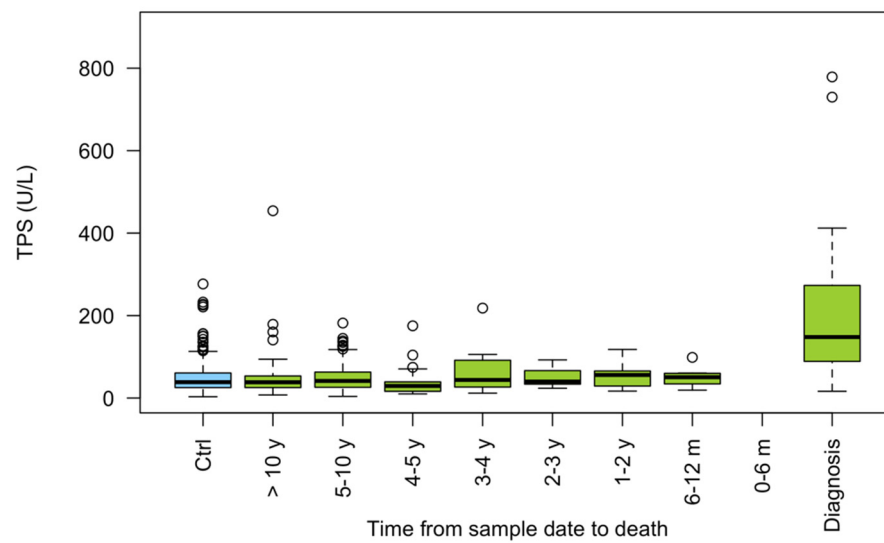

Supplement: s1 [file s1]
